# Supplementary material for: Type 1 Diabetes Patients’ Practice, Knowledge and Attitudes towards Influenza Immunization
Source: MDPI journal article supplement (doi:10.3390/vaccines9070707), 2021-06-29
Supplement: s1 [file s1]

**Table S1.** Framework of our knowledge score, based on selected questions from the administered survey.

|                                                                                                                                                               | Score Assigned to Correct Answer |
|---------------------------------------------------------------------------------------------------------------------------------------------------------------|----------------------------------|
| <b>General questions</b>                                                                                                                                      |                                  |
| People with diabetes are at higher risk of developing infectious diseases compared to the general population.                                                 | 50                               |
| The course of some infectious diseases may be worse in patients with diabetes compared to the general population.                                             | 50                               |
| In Italy there are recommended vaccinations for people with diabetes, regardless of their age.                                                                | 25                               |
| Some vaccinations are recommended for close contacts and caregivers of people with diabetes.                                                                  | 25                               |
| <b>What vaccinations do you think are recommended by the Ministry of Health and offered free of charge for people with diabetes, regardless of their age?</b> |                                  |
| Chicken pox vaccine                                                                                                                                           | 10                               |
| Herpes Zoster vaccine                                                                                                                                         | 10                               |
| Pneumococcal vaccine                                                                                                                                          | 10                               |
| Meningococcal type B vaccine                                                                                                                                  | 10                               |
| Meningococcal type C / ACWY vaccine                                                                                                                           | 10                               |
| Influenza vaccine                                                                                                                                             | 10                               |
| Measles / mumps / rubella vaccine                                                                                                                             | 10                               |
| Hepatitis A vaccine                                                                                                                                           | 10                               |
| Tuberculosis vaccine                                                                                                                                          | 10                               |
| Human Papillomavirus vaccine                                                                                                                                  | 10                               |
| <b>Total</b>                                                                                                                                                  | <b>0–250</b>                     |
